# Supplementary material for: Sb-Phenyl-N-methyl-5,6,7,12-tetrahydrodibenz[c,f][1,5]azastibocine Induces Perlecan Core Protein Synthesis in Cultured Vascular Endothelial Cells
Source: MDPI journal article supplement (doi:10.3390/ijms24043656), 2023-02-11
Supplement: s1 [file s1]

**Table S1.** Organoantimony compounds used in this study.

| <b>No.</b>        |                                       | <b>Molecular Form/Name</b>                                                                                 |
|-------------------|---------------------------------------|------------------------------------------------------------------------------------------------------------|
| PMTAS             | C <sub>21</sub> H <sub>20</sub> NSb   | <i>Sb</i> -Phenyl- <i>N</i> -methyl-5,6,7,12-tetrahydrodibenz[ <i>c,f</i> ][1,5]azastibocine               |
| SbPh <sub>3</sub> | C <sub>18</sub> H <sub>15</sub> Sb    | Triphenylstibane                                                                                           |
| DBMA              | C <sub>15</sub> H <sub>17</sub> N     | <i>N</i> -Methyldibenzylamine                                                                              |
| 1                 | C <sub>14</sub> H <sub>12</sub> BrOSb | <i>Sb</i> -Bromo-7,12-dihydrodibenzo[ <i>c,f</i> ][1,5]oxastibocine                                        |
| 2                 | C <sub>14</sub> H <sub>12</sub> BrSSb | <i>Sb</i> -Bromo-7,12-dihydrodibenzo[ <i>c,f</i> ][1,5]thiastibocine                                       |
| 3                 | C <sub>14</sub> H <sub>12</sub> ClSSb | <i>Sb</i> -Chloro-7,12-dihydrodibenzo[ <i>c,f</i> ][1,5]thiastibocine                                      |
| 4                 | C <sub>15</sub> H <sub>15</sub> BrNSb | <i>Sb</i> -Bromo- <i>N</i> -methyl-5,6,7,12-tetrahydrodibenz[ <i>c,f</i> ][1,5]azastibocine                |
| 5                 | C <sub>15</sub> H <sub>15</sub> ClNSb | <i>Sb</i> -Chloro- <i>N</i> -methyl-5,6,7,12-tetrahydrodibenz[ <i>c,f</i> ][1,5]azastibocine               |
| 6                 | C <sub>15</sub> H <sub>15</sub> FNSb  | <i>Sb</i> -Fluoro- <i>N</i> -methyl-5,6,7,12-tetrahydrodibenz[ <i>c,f</i> ][1,5]azastibocine               |
| 7                 | C <sub>16</sub> H <sub>17</sub> BrNSb | <i>Sb</i> -Bromo- <i>N</i> -ethyl-5,6,7,12-tetrahydrodibenz[ <i>c,f</i> ][1,5]azastibocine                 |
| 8                 | C <sub>16</sub> H <sub>18</sub> NSb   | <i>Sb</i> , <i>N</i> -Dimethyl-5,6,7,12-tetrahydrodibenz[ <i>c,f</i> ][1,5]azastibocine                    |
| 9                 | C <sub>17</sub> H <sub>19</sub> ClNSb | <i>Sb</i> -Chloro- <i>N</i> -isopropyl-5,6,7,12-tetrahydrodibenz[ <i>c,f</i> ][1,5]azastibocine            |
| 10                | C <sub>18</sub> H <sub>21</sub> BrNSb | <i>Sb</i> -Bromo- <i>N</i> - <i>tert</i> -butyl-5,6,7,12-tetrahydrodibenz[ <i>c,f</i> ][1,5]azastibocine   |
| 11                | C <sub>18</sub> H <sub>21</sub> BrNSb | <i>Sb</i> -Bromo- <i>N</i> -isobutyl-5,6,7,12-tetrahydrodibenz[ <i>c,f</i> ][1,5]azastibocine              |
| 12                | C <sub>19</sub> H <sub>24</sub> NSb   | <i>Sb</i> -Methyl- <i>N</i> - <i>tert</i> -butyl-5,6,7,12-tetrahydrodibenz[ <i>c,f</i> ][1,5]azastibocine  |
| 13                | C <sub>19</sub> H <sub>26</sub> NSbSi | <i>Sb</i> -Trimethylsilylmethyl- <i>N</i> -methyl-5,6,7,12-tetrahydrodibenz[ <i>c,f</i> ][1,5]azastibocine |
| 14                | C <sub>20</sub> H <sub>17</sub> BrNSb | <i>Sb</i> -Bromo- <i>N</i> -phenyl-5,6,7,12-tetrahydrodibenz[ <i>c,f</i> ][1,5]azastibocine                |
| 15                | C <sub>20</sub> H <sub>17</sub> OSb   | <i>Sb</i> -Phenyl-7,12-dihydrodibenzo[ <i>c,f</i> ][1,5]oxastibocine                                       |
| 16                | C <sub>19</sub> H <sub>23</sub> NSb   | <i>Sb</i> -Bromo- <i>N</i> -cyclohexyl-5,6,7,12-tetrahydrodibenz[ <i>c,f</i> ][1,5]azastibocine            |
| 17                | C <sub>21</sub> H <sub>20</sub> NSb   | <i>Sb</i> -Phenyl- <i>N</i> -methyl-5,6,7,12-tetrahydrodibenz[ <i>c,f</i> ][1,5]azastibocine (PMTAS)       |
| 18                | C <sub>23</sub> H <sub>20</sub> NSb   | <i>Sb</i> -phenylethynyl- <i>N</i> -methyl-5,6,7,12-tetrahydrodibenz[ <i>c,f</i> ][1,5]azastibocine        |
| 19                | C <sub>24</sub> H <sub>22</sub> NSb   | <i>Sb</i> -phenylethynyl- <i>N</i> -ethyl-5,6,7,12-tetrahydrodibenz[ <i>c,f</i> ][1,5]azastibocine         |
| 20                | C <sub>24</sub> H <sub>26</sub> NSb   | <i>Sb</i> -Phenyl- <i>N</i> - <i>tert</i> -butyl-5,6,7,12-tetrahydrodibenz[ <i>c,f</i> ][1,5]azastibocine  |
| 21                | C <sub>25</sub> H <sub>24</sub> NSb   | <i>Sb</i> -phenylethynyl- <i>N</i> -isopropyl-5,6,7,12-tetrahydrodibenz[ <i>c,f</i> ][1,5]azastibocine     |
| 22                | C <sub>26</sub> H <sub>26</sub> NSb   | <i>Sb</i> -phenylethynyl- <i>N</i> -isobutyl-5,6,7,12-tetrahydrodibenz[ <i>c,f</i> ][1,5]azastibocine      |
| 23                | C <sub>28</sub> H <sub>22</sub> NSb   | <i>Sb</i> -phenylethynyl- <i>N</i> -phenyl-5,6,7,12-tetrahydrodibenz[ <i>c,f</i> ][1,5]azastibocine        |
| 24                | C <sub>28</sub> H <sub>28</sub> NSb   | <i>Sb</i> -phenylethynyl- <i>N</i> -cyclohexyl-5,6,7,12-tetrahydrodibenz[ <i>c,f</i> ][1,5]azastibocine    |
