# Supplementary figures and images for: Sb-Phenyl-N-methyl-5,6,7,12-tetrahydrodibenz[c,f][1,5]azastibocine Induces Perlecan Core Protein Synthesis in Cultured Vascular Endothelial Cells
Source: MDPI journal article supplement (doi:10.3390/ijms24043656), 2023-02-11

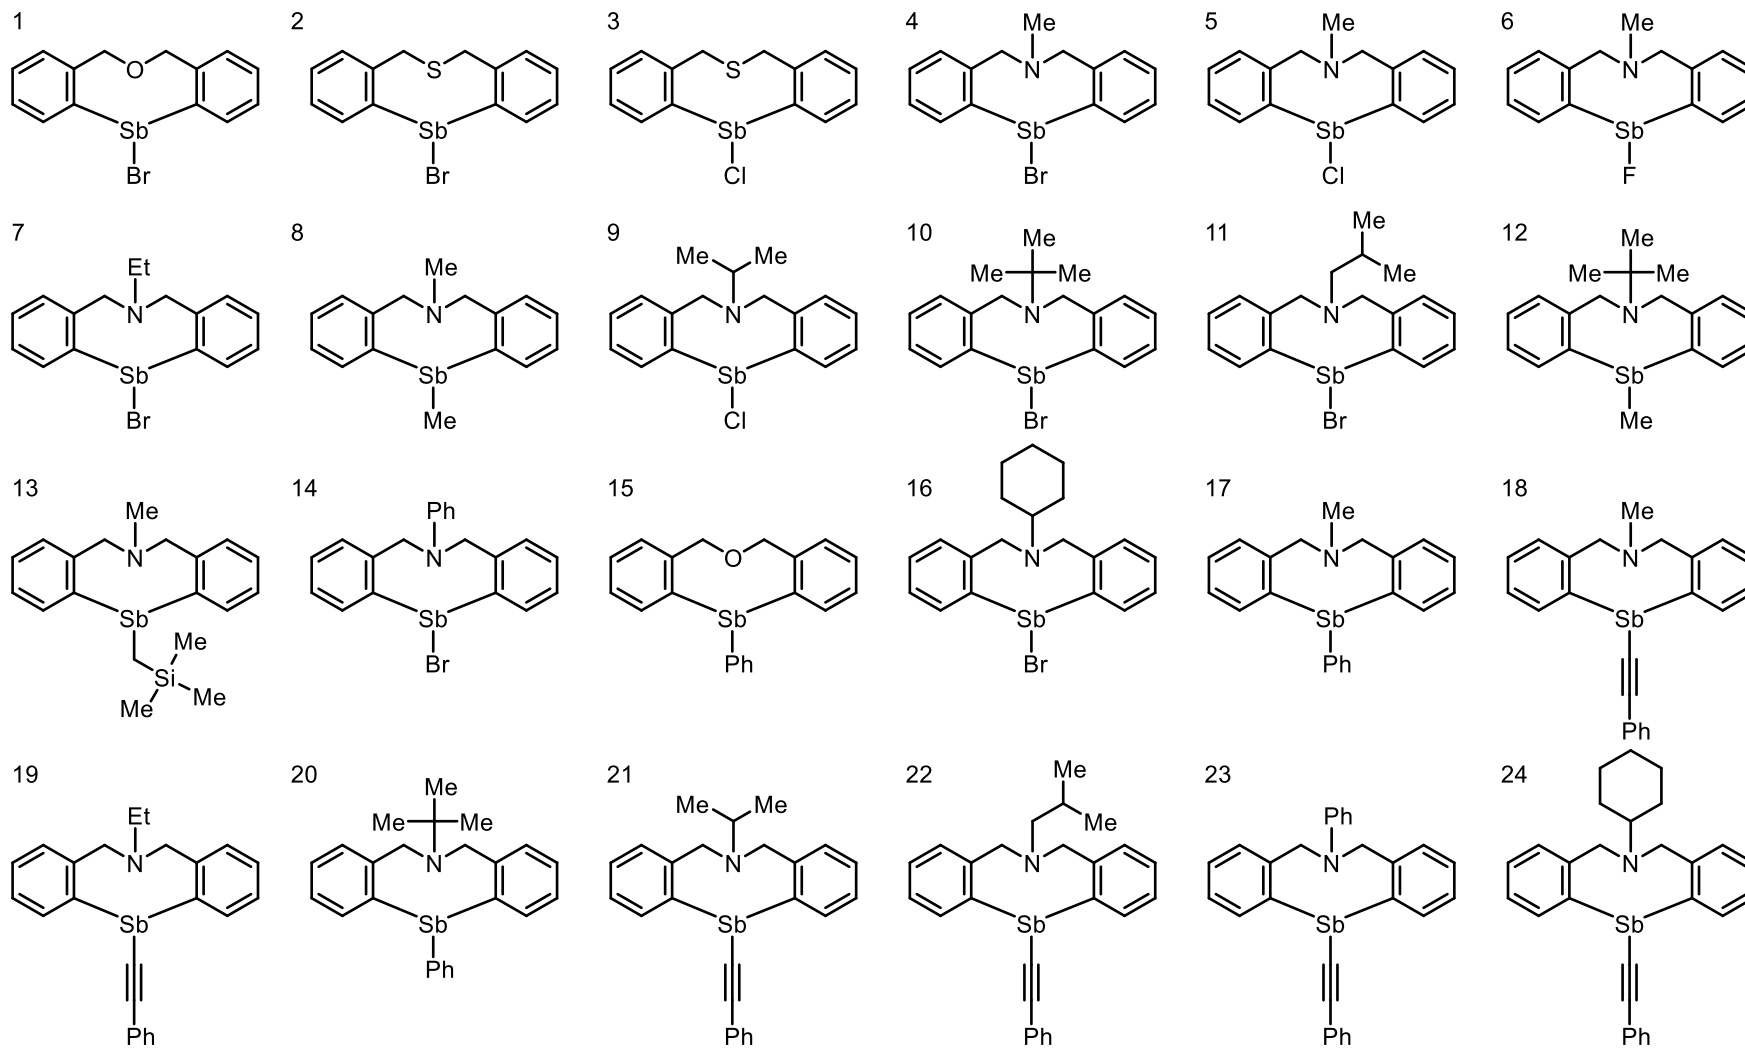

Supplement: s1 [file s1]
